# Supplementary material
Source: MDPI journal article supplement (https://www.mdpi.com/2076-3417/12/22/11474)
Supplement: s1 [file s1 › applsci-1958199-supplementary.pdf]

**Supplementary 1.** Sampling of bottom sediments with a Petersen dredge.

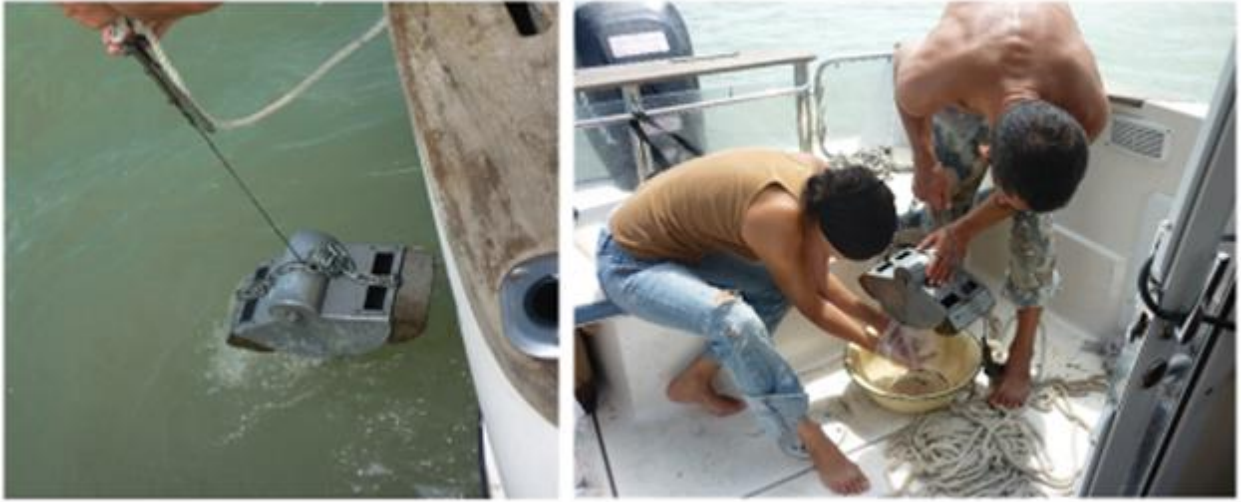

# Supplementary 2. Test protocol for spectrometric analysis results (the example: determination of Cu concentration).

Cu (324.7nm)

File Comment:

Comment:

FlameCont

## Instrument Information

Device Name: AA

| Type | Model Name | ROM Version | S/N          |
|------|------------|-------------|--------------|
| AA   | AA-7000F   | 1.01        | A30665001722 |
| ASC  |            |             |              |
| GFA  |            |             |              |

## Optics Parameters

|                              |        |
|------------------------------|--------|
| Element:                     | Cu     |
| Socket #:                    | 4      |
| Lamp Current Low(Peak) (mA): | 8      |
| Wavelength(nm):              | 324.7  |
| Slit Width(nm):              | 0.7    |
| Lamp Mode:                   | BGC-D2 |

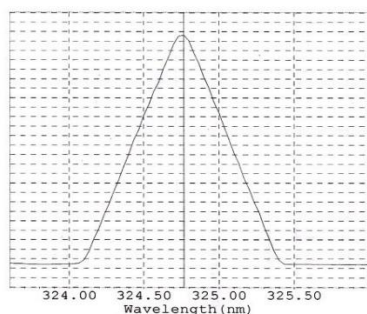

## Measurement Parameters

|                         |           |
|-------------------------|-----------|
| Order:                  | 1st       |
| Zero Intercept:         | Non-Pass  |
| Conc. Unit:             | mg/L      |
| Repetition Sequence:    | SM-SM-... |
| Pre-Spray Time (sec):   | 3         |
| Integration Time (sec): | 5         |
| Response Time:          | 1         |

|          | Num Reps. | Max Reps. | RSD Limit | SD Limit |
|----------|-----------|-----------|-----------|----------|
| Blank    | 1         | 1         | 99.90     | 0.0000   |
| Standard | 3         | 3         | 99.90     | 0.0000   |
| Sample   | 3         | 3         | 99.90     | 0.0000   |
| Reslope  | 1         | 1         | 99.90     | 0.0000   |

## Calibration Curve (C# : 01)

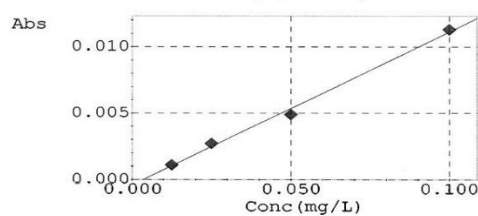

| Conc (mg/L) | Abs    |
|-------------|--------|
| 0.0125      | 0.0011 |
| 0.0250      | 0.0027 |
| 0.0500      | 0.0049 |
| 0.1000      | 0.0113 |

$$\text{Abs} = 0.11548 \text{Conc} - 0.00041304$$

$$r = 0.9975$$

2-n : UNK

| Conc.  | Abs.   | Actual Conc. | Date      | Time              |
|--------|--------|--------------|-----------|-------------------|
| 0.0014 | 0.0002 | 0.0014       | 8/14/2013 | 1:41:12 PM(+0600) |

### Supplementary 3. Test protocol for spectrometric analysis results (the example: determination of Zn concentration).

Zn (213.9nm)

File Comment:

Comment:

FlameCont

#### Instrument Information

Device Name: AA

| Type | Model Name | ROM Version | S/N          |
|------|------------|-------------|--------------|
| AA   | AA-7000F   | 1.01        | A30665001722 |
| ASC  |            |             |              |
| GFA  |            |             |              |

#### Optics Parameters

|                              |        |
|------------------------------|--------|
| Element:                     | Zn     |
| Socket #:                    | 5      |
| Lamp Current Low(Peak) (mA): | 8      |
| Wavelength(nm):              | 213.9  |
| Slit Width(nm):              | 0.7    |
| Lamp Mode:                   | BGC-D2 |

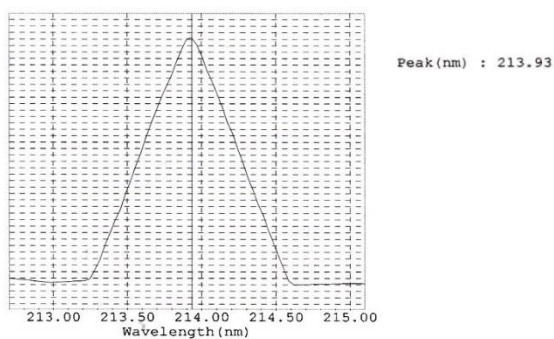

#### Measurement Parameters

|                         |           |
|-------------------------|-----------|
| Order:                  | 1st       |
| Zero Intercept:         | Non-Pass  |
| Conc. Unit:             | mg/L      |
| Repetition Sequence:    | SM-SM-... |
| Pre-Spray Time (sec):   | 3         |
| Integration Time (sec): | 5         |
| Response Time:          | 1         |

|          | Num Reps. | Max Reps. | RSD Limit | SD Limit |
|----------|-----------|-----------|-----------|----------|
| Blank    | 1         | 1         | 99.90     | 0.0000   |
| Standard | 3         | 3         | 99.90     | 0.0000   |
| Sample   | 3         | 3         | 99.90     | 0.0000   |
| Reslope  | 1         | 1         | 99.90     | 0.0000   |

Calibration Curve (C# : 01)

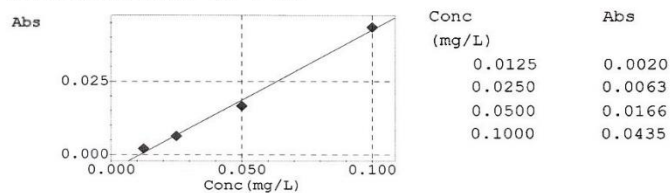

Abs=0.48000Conc-0.0054000

r=0.9967

5-n : UNK

| Conc.  | Abs.   | ActualConc. | Date      | Time              |
|--------|--------|-------------|-----------|-------------------|
| 0.1800 | 0.0314 | 0.1800      | 8/12/2013 | 3:35:43 PM(+0600) |
